# Supplementary material for: Phosphodiesterase 4B negatively regulates endotoxin-activated interleukin-1 receptor antagonist responses in macrophages
Source: PubMed Central journal article supplement (PMC5382768; doi:10.1038/srep46165), 2017-04-06

**Phosphodiesterase 4B negatively regulates endotoxin-activated interleukin-1 receptor antagonist responses in macrophages**

Jing-Xing Yang<sup>1</sup>, Kou-Chou Hsieh<sup>2</sup>, Yi-Ling Chen<sup>1</sup>, Chien-Kuo Lee<sup>3</sup>, Marco Conti<sup>4</sup>,  
Tsung-Hsien Chuang<sup>5</sup>, Chin-Pyng Wu<sup>2,\*</sup> and S.-L. Catherine Jin<sup>1,\*</sup>

<sup>1</sup>Department of Life Sciences, National Central University, Zhongli District, Taoyuan City, Taiwan, Republic of China.

<sup>2</sup>Internal Medicine, Landseed Hospital, Pingzhen District, Taoyuan City, Taiwan, Republic of China.

<sup>3</sup>Graduate Institute of Immunology, National Taiwan University College of Medicine, Taipei, Taiwan, Republic of China.

<sup>4</sup>Department of Obstetrics, Gynecology, and Reproductive Sciences, University of California San Francisco, California, USA.

<sup>5</sup>Immunology Research Center, National Health Research Institutes, Miaoli, Taiwan, Republic of China.

\*These authors contributed equally to this work.

**\*Correspondence:** Professor S.-L. Catherine Jin, Department of Life Sciences, National Central University, 300 Zhongda Road, Zhongli District, Taoyuan City, Taiwan, R.O.C. Tel: +886-3-4227151 ext. 65066, e-mail: [slcj@ncu.edu.tw](mailto:slcj@ncu.edu.tw)

## SUPPLEMENTARY FIGURE LEGENDS

### **sFigure 1. Effect of rolipram on LPS-induced icIL-1Ra mRNA expression in**

**mouse macrophages.** Raw 264.7 cells (A) and mouse peritoneal macrophages (B)

were pretreated for 20 min with 10  $\mu$ M rolipram prior to LPS (10 ng/ml) stimulation

for 3 h. The icIL-1Ra mRNA levels in the cells were determined by real-time PCR

and expressed as fold induction to the untreated cells. Data are the mean  $\pm$  SEM ( $n =$

4 in A;  $n = 5$  in B).

### **sFigure 2. Rolipram does not alter cell viability in LPS-stimulated macrophages.**

Raw 264.7 cells (A) and mouse peritoneal macrophages (B) were pretreated for 20

min with 10  $\mu$ M rolipram before LPS (10 ng/ml) stimulation for 8 h. Cell viability

was determined by the MTT assay as described in the Methods. Data are the mean  $\pm$

SEM ( $n = 4$  in A;  $n = 5-6$  in B).

### **sFigure 3. PDE4 isoform expression and regulation of PDE4B ablation on**

**IL-1Ra secretion in LPS-stimulated bone marrow-derived macrophages. (A-C)**

Bone marrow-derived macrophages (BMDM) were incubated with or without LPS

(100 ng/ml) for 3 h. The levels of PDE4A (A), PDE4B (B), and PDE4D (C) mRNA

were determined by real-time PCR and expressed as fold change to the untreated cells.

(D) BMDM prepared from PDE4B<sup>+/+</sup> and PDE4B<sup>-/-</sup> mice were pretreated for 20 min

with rolipram (10  $\mu$ M) followed by LPS (100 ng/ml) stimulation for 8 h. IL-1Ra

accumulation in the medium supernatant was measured by ELISA. Data are the mean  $\pm$  SEM ( $n = 5$  in A-C;  $n = 4-6$  in D).

**sFigure 4.** Uncropped gel images of Western blots seen in Figure 7A. Two images with different brightness adjustments (25% and 50%) are shown.

**sFigure 5.** Uncropped gel images of Western blots seen in Figure 7C. Two images with different brightness adjustments (25% and 50%) are shown.

Supplementary Figure 1

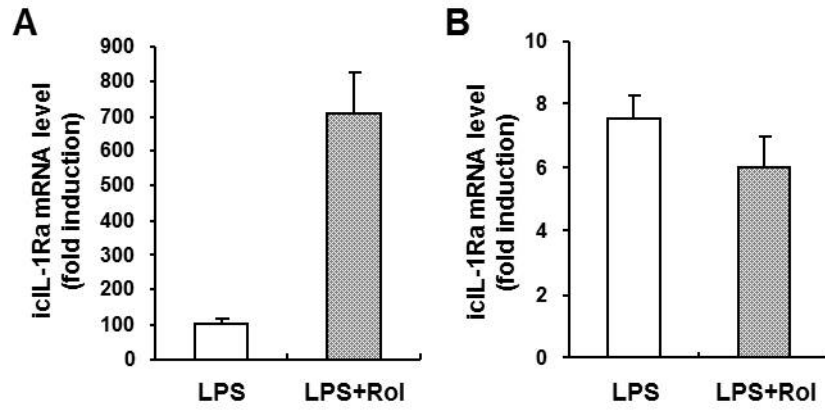

Supplementary Figure 2

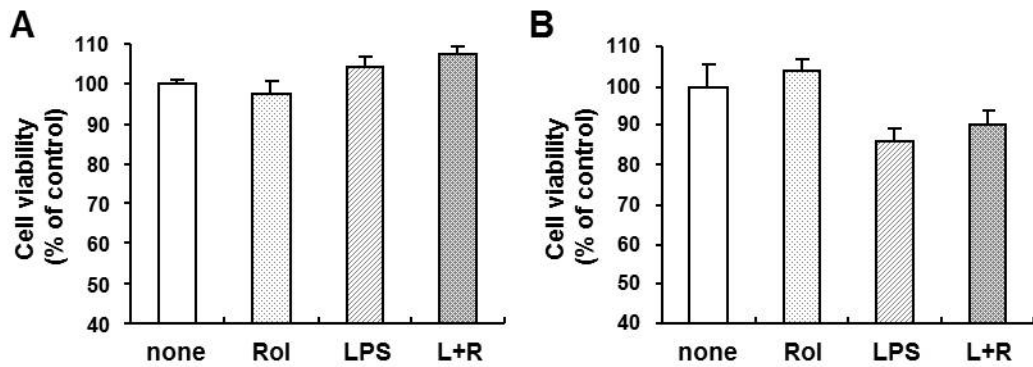

### Supplementary Figure 3

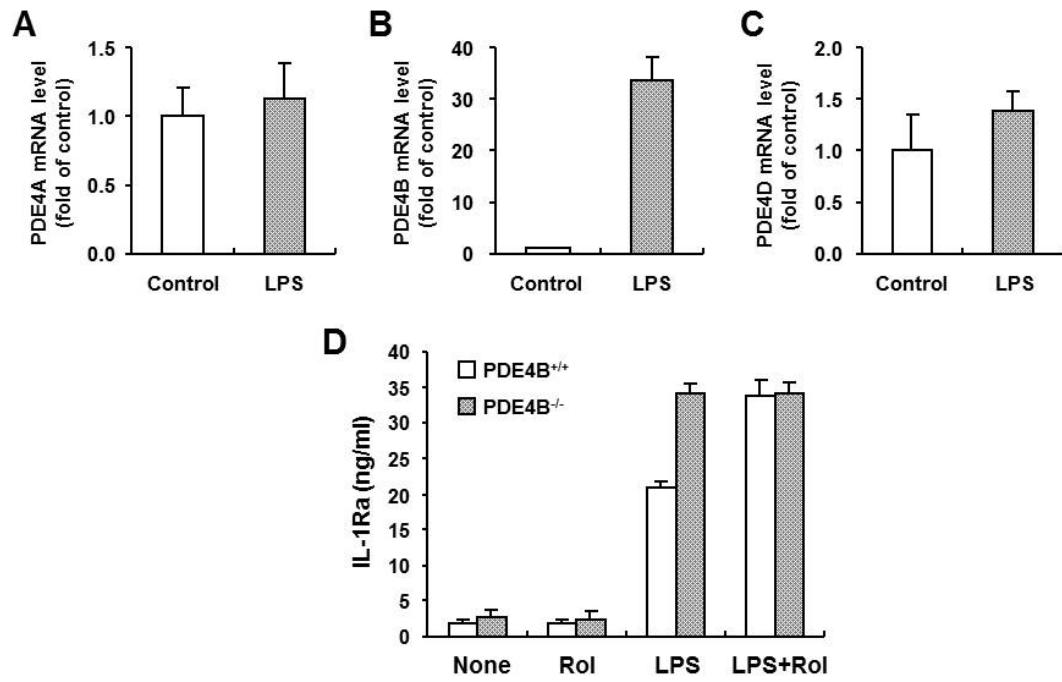

## Supplementary Figure 4

25% brightness adjustment

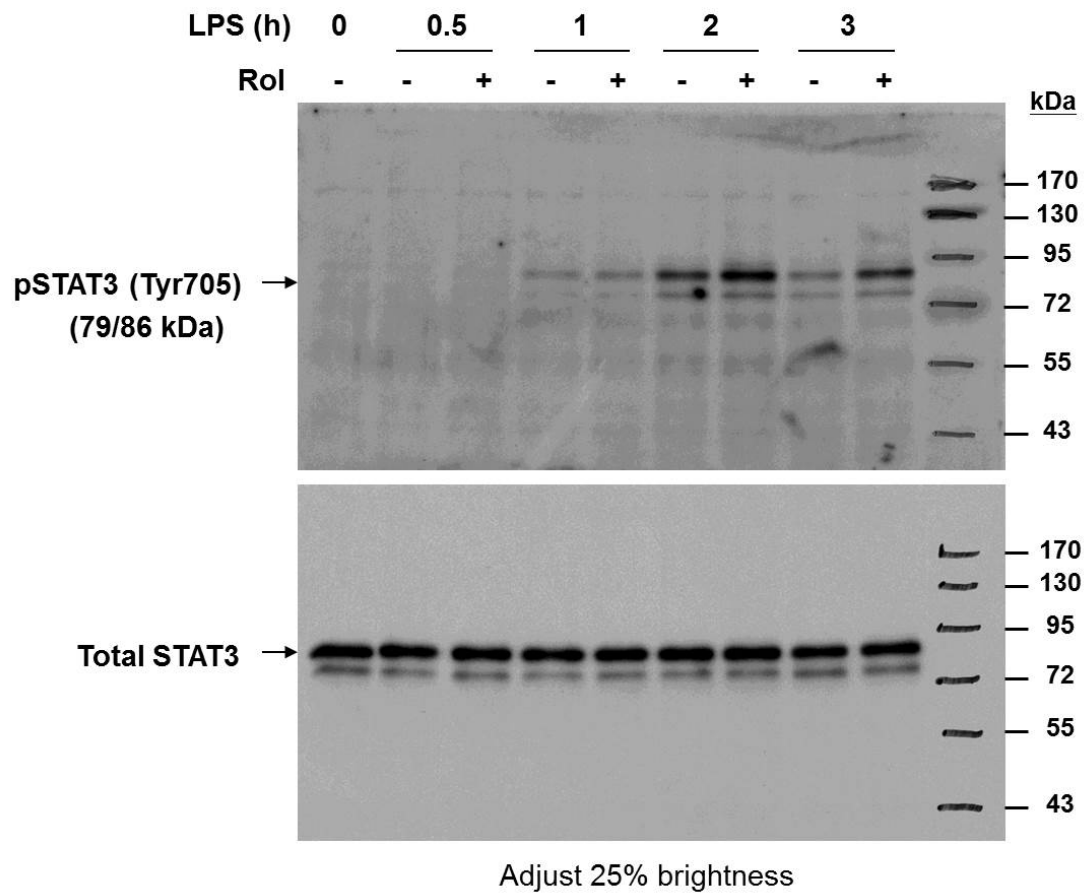

## Supplementary Figure 4

50% brightness adjustment

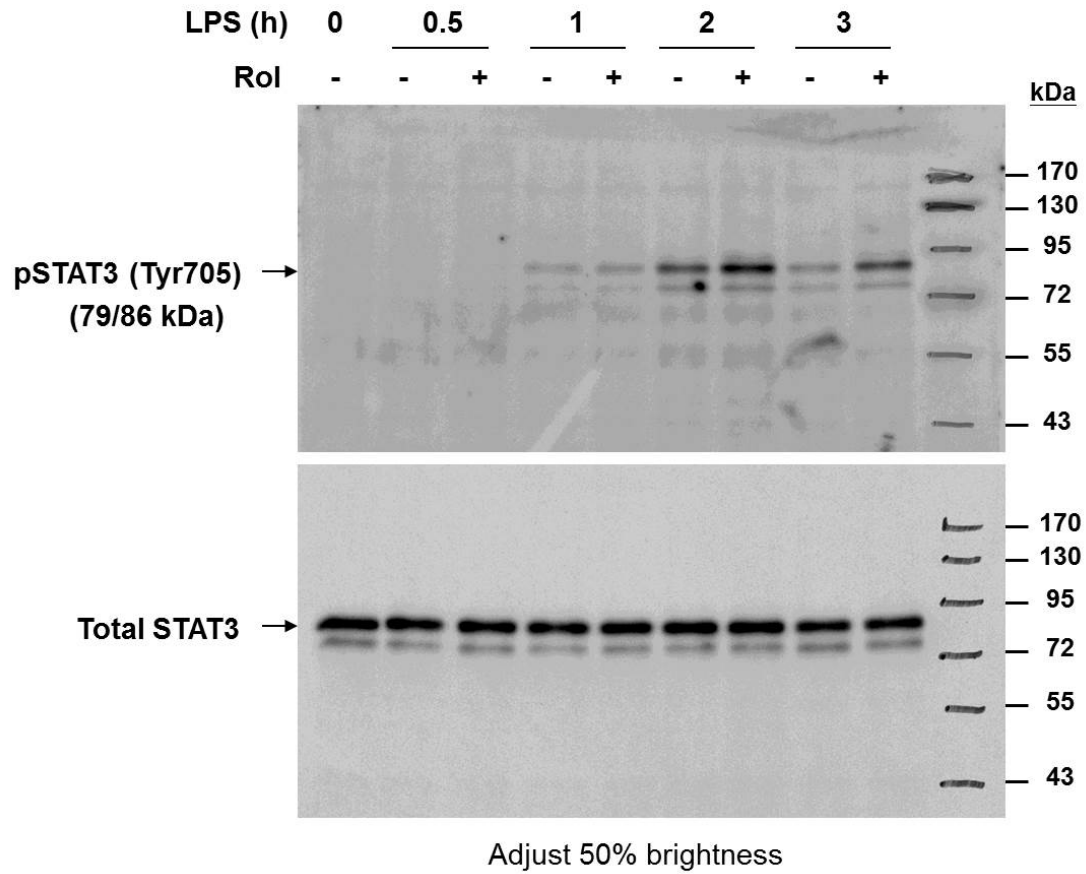

## Supplementary Figure 5

25% brightness adjustment

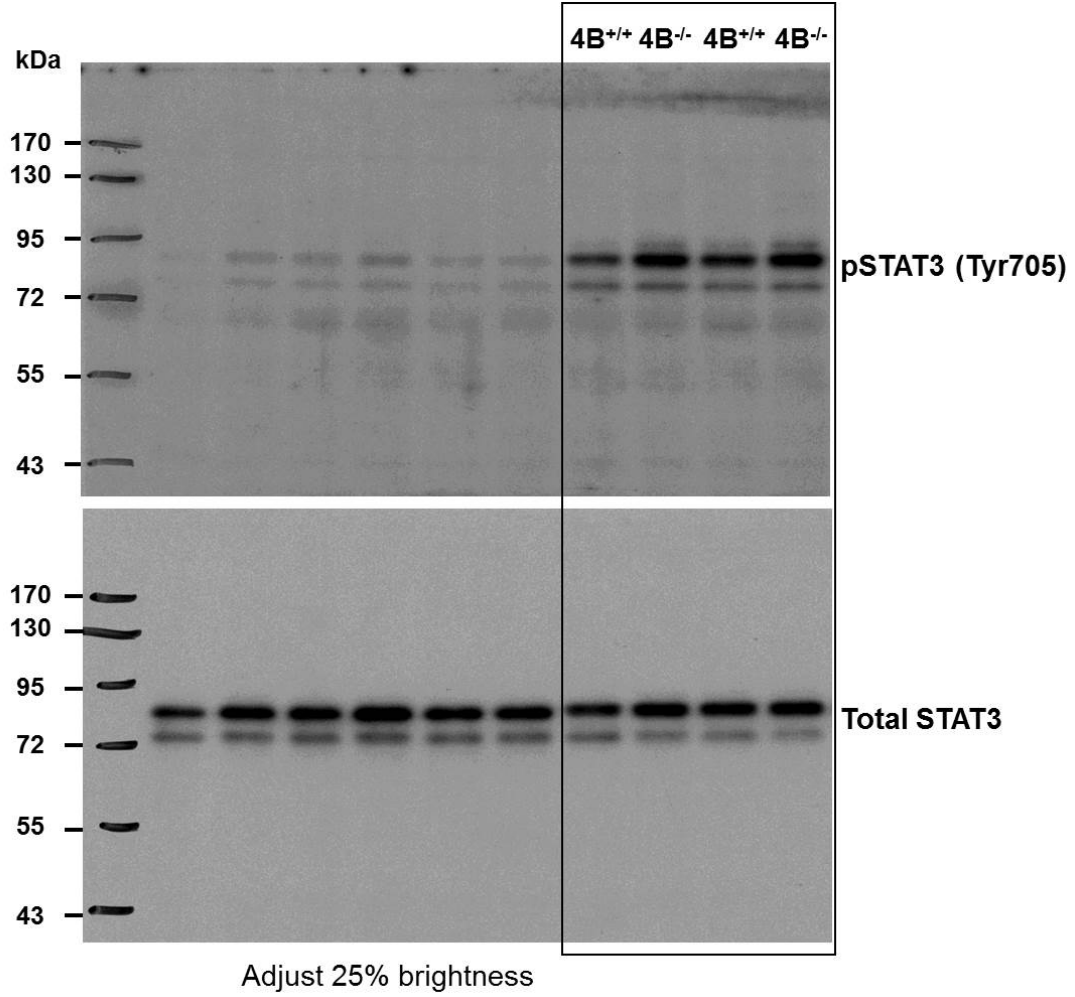



## Supplementary Figure 5

50% brightness adjustment

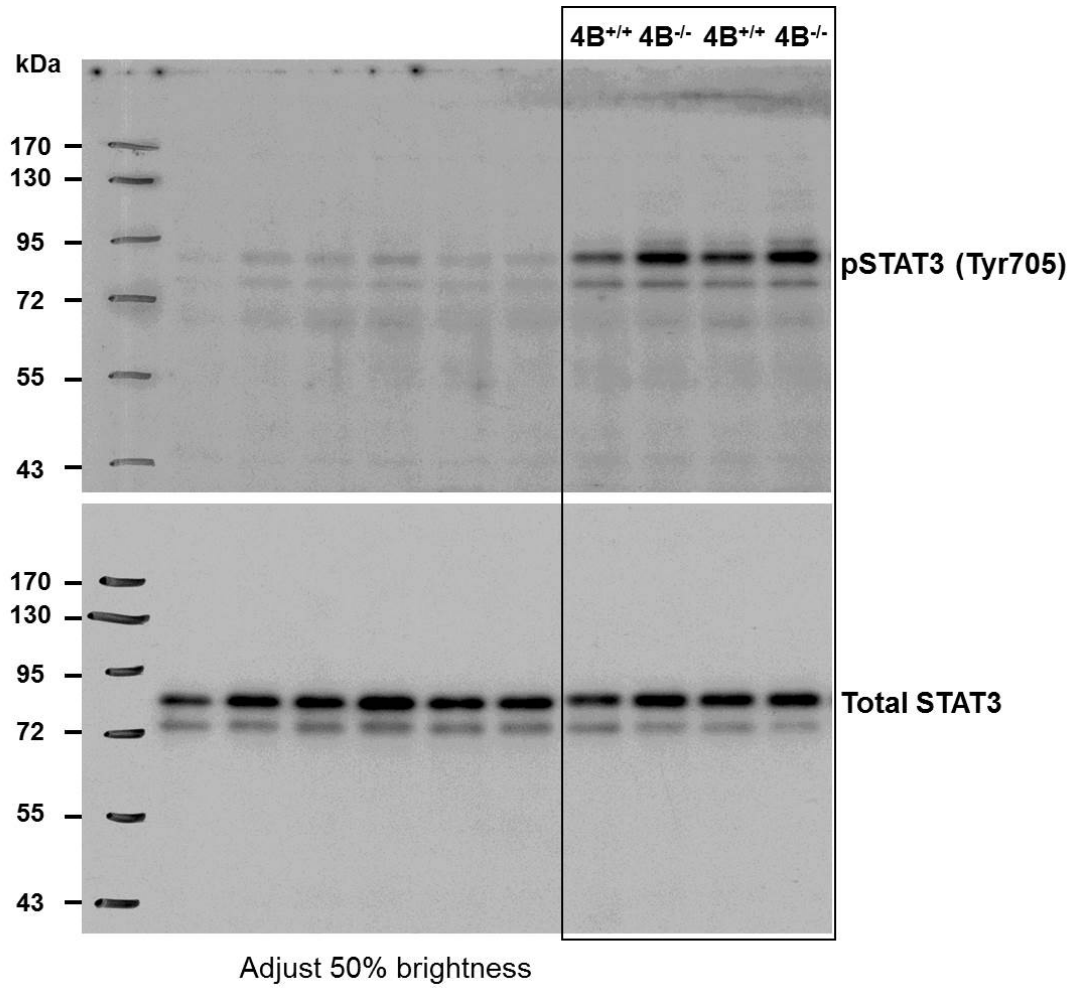

Supplement: srep46165-s1.pdf [file srep46165-s1.pdf]
